# Supplementary material for: Experiences and management of physician psychological symptoms during infectious disease outbreaks: a rapid review
Source: Springer Nature journal article supplement (doi:10.1186/s12888-021-03090-9), 2021-02-10
Supplement: MOESM2 [file 18852506]

## Additional File 2. Medline Search

1. exp physician/ or physician\*.mp. or "medical trainee".mp. or "medical trainees".mp. or doctor\*.mp. or consultant\*.mp. or resident\*.mp. or fellow\*.mp. or registrar\*.mp. or "general practitioner".mp. or "general practitioners".mp.
2. stress disorders, traumatic/ or stress disorders, post-traumatic/ or stress disorders, traumatic, acute/
3. exp Stress, Psychological/
4. Stress, Physiological/
5. Adaptation, Psychological/
6. fear/ or panic/
7. anxiety/ or catastrophization/
8. exp Anxiety Disorders/
9. Mental Health/
10. "Trauma and Stressor Related Disorders"/
11. (stress\* or anxiet\* or fear\* or panic\* or nervous\* or dread\* or apprehensi\* \* or pressure\* or overwhelm\*).mp.
12. PTSD.mp.
13. catastroph\*.mp.
14. (mental adj2 (health or ill or illness)).mp.
15. or/2-14
16. exp Disease Outbreaks/
17. Hemorrhagic Fever, Ebola/
18. influenza a virus, h1n1 subtype/ or influenza a virus, h3n2 subtype/
19. Influenza, Human/
20. Influenza A virus/
21. Orthomyxoviridae/
22. SARS Virus/
23. Severe Acute Respiratory Syndrome/
24. exp Coronavirus/
25. Coronavirus Infections/
26. Middle East Respiratory Syndrome Coronavirus/
27. Coronaviridae/
28. (pandemic\* or epidemic\* or outbreak\* or out break\* or (out adj2 break\*) or ebola\* or h1n1 or h3n2 or influenza A or influenza virus or SARS or severe acute respiratory syndrome or MERS or middle east respiratory syndrome or coronavirus\* or wuhan or beijing or shanghai or 2019-nCoV or nCov or COVID-19 or SARS-CoV-2).mp.
29. (pneumonia.mp. or exp pneumonia/) and Wuhan.mp.
30. or/16-29
31. 1 and 15 and 30
