# Supplementary material for: Experiences and management of physician psychological symptoms during infectious disease outbreaks: a rapid review
Source: Springer Nature journal article supplement (doi:10.1186/s12888-021-03090-9), 2021-02-10
Supplement: MOESM4 [file 18852506]

**Additional File 4.** Quality analysis of included studies (n=193)

| Cross-Sectional Studies     |                              |             |                 |                                              |                                                                                                                                     |                           |                  |                      |
|-----------------------------|------------------------------|-------------|-----------------|----------------------------------------------|-------------------------------------------------------------------------------------------------------------------------------------|---------------------------|------------------|----------------------|
| Newcastle-Ottawa Scale      |                              |             |                 |                                              |                                                                                                                                     |                           |                  |                      |
| Author (Year)               | Selection (Maximum 5 stars)  |             |                 |                                              | Comparability (Maximum 2 stars)                                                                                                     | Outcome (Maximum 3 stars) |                  | Quality Score        |
|                             | Representative of the sample | Sample size | Non-respondents | Ascertainment of the exposure (risk factor): | The subjects in different outcome groups are comparable, based on the study design or analysis. Confounding factors are controlled. | Assessment of outcome     | Statistical test | Total stars (Max 10) |
| Abdessater (2020)           | *                            | -           | -               | **                                           | *                                                                                                                                   | *                         | *                | 7                    |
| Abdulah and Mohammed (2020) | *                            | -           | -               | **                                           | *                                                                                                                                   | *                         | -                | 5                    |
| Abdulah and Musa (2020)     | *                            | -           | -               | **                                           | **                                                                                                                                  | *                         | -                | 6                    |
| Abebe (2016)                | *                            | -           | -               | *                                            | *                                                                                                                                   | *                         | *                | 5                    |
| Al Mahyijari (2020)         | *                            | -           | -               | **                                           | **                                                                                                                                  | *                         | -                | 6                    |
| Al Sulais (2020)            | *                            | -           | -               | **                                           | *                                                                                                                                   | *                         | *                | 7                    |
| Alahmadi (2020)             | *                            | -           | *               | **                                           | *                                                                                                                                   | *                         | *                | 7                    |
| AlAteeq (2020)              | -                            | *           | -               | **                                           | **                                                                                                                                  | *                         | *                | 7                    |
| Alhaj (2020)                | *                            | -           | -               | **                                           | **                                                                                                                                  | *                         | -                | 6                    |
| Ali (2020)                  | *                            | -           | -               | **                                           | *                                                                                                                                   | *                         | -                | 5                    |
| Almater (2020)              | *                            | -           | -               | **                                           | **                                                                                                                                  | *                         | *                | 7                    |
| Alnofaiey (2020)            | *                            | -           | -               | **                                           | *                                                                                                                                   | *                         | -                | 5                    |
| Alsubaie (2019)             | *                            | -           | -               | **                                           | *                                                                                                                                   | *                         | -                | 5                    |
| Amerio (2020)               | *                            | -           | -               | **                                           | *                                                                                                                                   | *                         | *                | 7                    |

|                          |   |   |   |    |    |   |   |   |
|--------------------------|---|---|---|----|----|---|---|---|
| Amin (2020)              | * | * | - | ** | *  | * | * | 7 |
| An (2020)                | - | - | - | -  | *  | * | * | 3 |
| Arafa (2020)             | * | - | - | ** | *  | * | * | 6 |
| Arshad and Islam (2020)  | * | - | - | ** | *  | * | * | 6 |
| Austria-Corrales (2011)  | * | - | - | ** | *  | * | * | 6 |
| Awano (2020)             | * | * | - | ** | *  | * | * | 7 |
| Ayub (2020)              | - | - | - | *  | *  | * | - | 3 |
| Azoulay (2020)           | * | - | - | ** | *  | * | - | 5 |
| Bahat (2020)             | * | - | - | -  | -  | * | - | 2 |
| Bajaj and Solanki (2020) | * | - | - | ** | -  | * | - | 4 |
| Bakry (2020)             | * | * | - | *  | -  | * | - | 4 |
| Banerjee (2020)          | * | - | - | *  | ** | * | - | 5 |
| Barik (2020)             | * | * | * | *  | -  | * | * | 6 |
| Bhargava (2020)          | * | - | - | *  | ** | * | * | 6 |
| Bitonti (2020)           | * | - | * | *  | *  | * | * | 6 |
| Bohlken (2020)           | * | - | - | -  | *  | * | - | 3 |
| Büntzel (2020)           | * | - | - | -  | -  | * | - | 2 |
| Buselli (2020)           | - | - | - | ** | ** | * | * | 6 |
| Cai (2020)               | * | - | - | ** | *  | * | - | 6 |
| Caliskan (2020)          | * | * | - | ** | ** | * | - | 7 |
| Chan (2004)              | * | - | - | ** | *  | * | * | 6 |
| Chang (2020)             | * | * | * | *  | ** | * | * | 8 |
| Chatterjee (2020)        | - | - | - | ** | *  | * | - | 5 |
| Chew (2020)              | * | - | * | ** | *  | * | * | 7 |
| Civantos, A. (2020) USA  | * | - | - | ** | *  | * | * | 7 |

|                            |   |   |   |    |    |   |   |   |
|----------------------------|---|---|---|----|----|---|---|---|
| Civantos, A. (2020) Brazil | * | - | - | ** | ** | * | - | 6 |
| Collins (2020)             | * | - | - | ** | ** | * | * | 7 |
| Cotrin (2020)              | * | * | - | ** | ** | * | - | 7 |
| Coyle (2020)               | * | - | - | -  | *  | * | - | 3 |
| Das (2020)                 | * | - | - | ** | ** | * | * | 7 |
| De Sio (2020)              | * | * | - | ** | ** | * | * | 8 |
| Degraeve (2020)            | * | - | - | ** | *  | * | * | 6 |
| Demirjian (2020)           | * | - | - | ** | ** | * | * | 7 |
| Di Monte (2020)            | * | - | - | ** | ** | * | - | 6 |
| Dimitriu (2020)            | - | - | - | ** | *  | * | - | 4 |
| Diomidous (2020)           | * | - | - | ** | *  | * | * | 6 |
| El Gaafary (2010)          | * | - | - | ** | *  | * | - | 5 |
| Elbay (2020)               | * | - | - | ** | *  | * | * | 7 |
| Elhadi and Msherghi (2020) | * | - | - | ** | ** | * | - | 6 |
| Elkholy (2020)             | * | * | - | ** | *  | * | * | 7 |
| Enyama (2020)              | * | * | * | *  | *  | * | - | 6 |
| Faderani (2020)            | * | - | - | ** | *  | * | * | 6 |
| Fargen (2020)              | * | - | - | *  | ** | * | * | 6 |
| Farooq (2020)              | - | - | - | ** | -  | * | - | 3 |
| Fekih-Romdhane (2020)      | * | - | - | ** | *  | * | * | 6 |
| Fitzpatrick (2020)         | * | - | * | *  | ** | * | * | 7 |
| Florin (2020)              | * | - | - | ** | *  | * | * | 6 |
| Foley (2020)               | * | - | * | *  | *  | * | * | 6 |
| Gallopeni (2020)           | - | - | - | ** | *  | * | - | 4 |

|                                      |   |   |   |    |    |   |   |   |
|--------------------------------------|---|---|---|----|----|---|---|---|
| Gangakhedkar and Solanki (2020)      | * | * | - | ** | *  | * | - | 6 |
| Gill (2020)                          | * | - | - | -  | -  | * | - | 2 |
| Gokdemir (2020)                      | * | * | - | ** | ** | * | * | 8 |
| Grace (2005)                         | * | - | - | *  | *  | * | - | 4 |
| Guillen-Astete (2020)                | * | - | - | ** | ** | * | * | 7 |
| Guiroy (2020)                        | * | - | - | ** | *  | * | - | 5 |
| Gupta (2020)                         | * | * | - | ** | ** | * | * | 8 |
| Hacimusalar (2020)                   | * | * | * | ** | ** | * | * | 9 |
| Halayam (2020)                       | * | - | - | ** | *  | * | - | 5 |
| Hasan (2020)                         | - | - | - | ** | ** | * | * | 6 |
| Hilmi (2020)                         | * | - | - | ** | ** | * | * | 7 |
| Holton (2020)                        | * | * | - | ** | ** | * | * | 8 |
| Huang, J. (2020)                     | * | - | - | ** | *  | * | - | 5 |
| Huffman (2020)                       | * | - | - | ** | ** | * | - | 6 |
| Imran (2020)                         | * | * | - | ** | *  | * | * | 7 |
| Jha (2020)                           | - | - | - | *  | *  | * | - | 3 |
| Jo (2020)                            | * | - | - | ** | ** | * | - | 6 |
| Johnson, A. (2020)                   | * | - | * | ** | *  | * | - | 6 |
| Johnson, S. (2020)                   | * | * | - | ** | *  | * | - | 6 |
| Juan (2020)                          | * | * | - | ** | ** | * | * | 8 |
| Kannampallil (2020)                  | * | - | - | ** | ** | * | * | 7 |
| Kapila (2020)                        | * | - | - | *  | *  | * | - | 4 |
| Khalafallah, A. (2020)<br>Attendings | * | - | - | ** | ** | * | * | 7 |

|                                     |   |   |   |    |    |   |   |   |
|-------------------------------------|---|---|---|----|----|---|---|---|
| Khalafallah, A. (2020)<br>Residents | - | - | - | ** | *  | * | - | 4 |
| Khanna (2020)                       | * | - | - | ** | ** | * | * | 7 |
| Khasne (2020)                       | - | - | - | ** | ** | * | * | 6 |
| Khattab (2020)                      | * | - | - | ** | ** | * | * | 7 |
| Khattab, M. and Abou-Madawi (2020)  | - | - | - | *  | *  | * | - | 3 |
| Khusid (2020)                       | * | - | - | *  | *  | * | - | 4 |
| Koh (2005)                          | * | - | - | *  | *  | * | - | 4 |
| Korkmaz (2020)                      | - | - | - | ** | *  | * | - | 4 |
| Kramer (2020)                       | * | - | - | *  | ** | * | * | 6 |
| Kuo (2020)                          | - | - | - | ** | ** | * | - | 5 |
| Kurt (2020)                         | * | - | - | ** | ** | * | - | 6 |
| Lai (2020)                          | * | * | * | ** | ** | * | - | 8 |
| Lee (2020)                          | * | - | - | ** | ** | * | - | 6 |
| Li (2020)                           | * | - | - | ** | ** | * | * | 7 |
| Liu, Y. (2020)                      | * | - | - | ** | ** | * | - | 6 |
| Louie (2020)                        | * | - | - | ** | ** | * | - | 6 |
| Malgor (2020)                       | * | - | - | ** | ** | * | - | 6 |
| Martinez-Lopez (2020)               | * | - | - | ** | ** | * | * | 7 |
| Milgrom, Y. (2020)                  | * | - | - | ** | ** | * | - | 6 |
| Milgrom, Y. and Richter, V. (2020)  | * | - | * | ** | ** | * | * | 8 |
| Mishra (2020)                       | * | - | - | *  | -  | * | - | 3 |
| Mohd-Fauzi (2020)                   | * | * | - | ** | ** | * | * | 8 |
| Monterrosa-Castro (2020)            | * | * | * | ** | ** | * | * | 9 |
| Mosheva (2020)                      | * | - | * | ** | ** | * | * | 8 |

|                        |   |   |   |    |    |   |   |   |
|------------------------|---|---|---|----|----|---|---|---|
| Naser (2020)           | * | * | - | ** | ** | * | * | 8 |
| Naser Moghadasi (2020) | * | - | - | ** | *  | * | - | 5 |
| Nickell (2004)         | * | - | - | ** | ** | * | - | 6 |
| Ning (2020)            | * | - | - | ** | ** | * | * | 7 |
| Norton (2020)          | * | - | - | *  | ** | * | * | 6 |
| O'Kelly (2020)         | - | - | - | ** | -  | * | - | 3 |
| Odedra (2020)          | * | - | - | *  | -  | * | - | 3 |
| Osama (2020)           | - | - | - | ** | *  | * | - | 4 |
| Pandey (2020)          | - | - | - | ** | -  | * | - | 3 |
| Payne (2020)           | * | - | - | *  | -  | * | - | 3 |
| Pilar (2020)           | * | - | - | ** | *  | * | - | 5 |
| Podder (2020)          | * | - | - | ** | *  | * | - | 5 |
| Poon (2004)            | * | - | - | ** | *  | * | - | 5 |
| Que (2020)             | * | - | - | ** | *  | * | * | 6 |
| Rajan (2020)           | * | - | - | *  | *  | * | - | 4 |
| Rajwa (2020)           | * | - | - | *  | ** | * | - | 5 |
| Rimmer (2020)          | - | - | - | -  | *  | * | - | 2 |
| Robbins (2020)         | * | - | - | ** | *  | * | - | 5 |
| Rodriguez (2020)       | * | - | * | ** | *  | * | * | 7 |
| Ruiz-Fernandez (2020)  | * | - | - | ** | ** | * | - | 6 |
| Rymarowicz (2020)      | * | - | - | *  | ** | * | * | 6 |
| Saadeh (2020)          | - | - | - | *  | ** | * | * | 5 |
| Sahin (2020)           | * | * | - | ** | ** | * | * | 8 |
| Sahu (2020)            | * | - | - | ** | *  | * | - | 5 |
| Salopek-Ziha (2020)    | - | - | - | ** | ** | * | - | 5 |
| Saracoglu (2020)       | - | - | - | ** | ** | * | - | 5 |

|                           |   |   |   |    |    |   |   |   |
|---------------------------|---|---|---|----|----|---|---|---|
| Sarma (2020)              | * | - | - | ** | -  | * | - | 4 |
| Saurabh and Ranjan (2020) | * | - | - | *  | -  | * | - | 3 |
| Sayari (2020)             | * | - | - | *  | ** | * | * | 6 |
| Schmulson (2020)          | * | - | - | *  | -  | * | - | 3 |
| Schwartz (2020)           | * | - | - | *  | ** | * | - | 5 |
| Shah, N. (2020)           | * | - | - | ** | ** | * | - | 6 |
| Shah, S. (2020)           | * | - | - | -  | ** | * | - | 4 |
| Shalhub (2020)            | * | - | * | ** | ** | * | * | 8 |
| Shanghavi (2020)          | - | - | - | ** | -  | * | - | 3 |
| Shao (2020)               | * | - | - | ** | *  | * | * | 6 |
| Sharif (2020)             | * | - | - | ** | *  | * | * | 7 |
| Sharma (2020)             | * | - | * | ** | ** | * | * | 8 |
| Shechter (2020)           | * | * | * | ** | *  | * | - | 7 |
| Sil (2020)                | * | - | - | ** | *  | * | - | 5 |
| Singariya (2020)          | * | * | * | ** | ** | * | * | 9 |
| Skoda (2020)              | * | - | - | ** | ** | * | * | 7 |
| Song (2020)               | * | - | - | ** | ** | * | - | 6 |
| Sorokin (2020)            | * | - | - | ** | *  | * | - | 5 |
| Suryavanshi (2020)        | * | - | - | ** | ** | * | * | 7 |
| Tan (2020)                | - | - | * | ** | ** | * | - | 6 |
| Tang (2017)               | * | - | - | ** | *  | * | - | 5 |
| Tas (2020)                | * | - | - | ** | *  | * | - | 5 |
| Tham (2005)               | * | - | - | ** | *  | * | - | 5 |
| Thomaier (2020)           | * | - | - | ** | ** | * | - | 6 |
| Tolomiczenko (2005)       | * | - | - | *  | *  | * | - | 4 |
| Tzeng (2008)              | * | - | - | ** | *  | * | - | 5 |

|                 |   |   |   |    |    |   |   |   |
|-----------------|---|---|---|----|----|---|---|---|
| Urooj (2020)    | - | - | - | ** | -  | * | - | 3 |
| Uvais (2020)    | * | - | - | ** | *  | * | - | 5 |
| Uyaroglu (2020) | * | - | - | ** | ** | * | - | 6 |
| Vafaei (2020)   | - | - | - | ** | *  | * | - | 4 |
| Vallee (2020)   | * | * | * | ** | ** | * | * | 9 |
| Vanni (2020)    | * | - | - | ** | ** | * | - | 6 |
| Verma (2004)    | * | - | - | ** | ** | * | * | 7 |
| Wang, H. (2020) | * | * | - | ** | ** | * | * | 8 |
| Wang, Y. (2020) | * | - | - | ** | ** | * | * | 7 |
| Weiner (2020)   | * | - | - | -  | ** | * | * | 5 |
| Wong (2008)     | * | - | - | ** | ** | * | * | 7 |
| Wong (2004)     | * | - | * | *  | ** | * | - | 6 |
| Wong (2005)     | * | - | - | *  | *  | * | - | 4 |
| Wong (2007)     | - | - | - | *  | ** | * | * | 5 |
| Wu (2020)       | - | - | - | -  | -  | * | - | 1 |
| Yang (2020)     | * | - | - | ** | ** | * | * | 7 |
| Zerbini (2020)  | - | - | - | ** | *  | * | - | 4 |
| Zhang (2020)    | * | - | - | ** | ** | * | * | 7 |
| Zhu (2020)      | * | - | - | ** | *  | * | - | 5 |



### Cohort Studies

| Author (Year) | Newcastle-Ottawa Scale            |                                 |                           |                                                                              |                                                                 |                           |                                                  |                               |                      |
|---------------|-----------------------------------|---------------------------------|---------------------------|------------------------------------------------------------------------------|-----------------------------------------------------------------|---------------------------|--------------------------------------------------|-------------------------------|----------------------|
|               | Selection (Maximum 5 stars)       |                                 |                           |                                                                              | Comparability (Maximum 2 stars)                                 | Outcome (Maximum 3 stars) |                                                  |                               | Quality Score        |
|               | Representatives of exposed cohort | Selection of non-exposed cohort | Ascertainment of exposure | Demonstration that the outcome of interest was not present at start of study | Comparability of cohorts on the basis of the design or analysis | Assessment of outcome     | Was follow-up long enough for outcomes to occur? | Adequacy of follow-up cohorts | Total stars (Max 10) |
| de Wit (2020) | *                                 | *                               | -                         | -                                                                            | **                                                              | -                         | *                                                | *                             | 6                    |
| Kelker (2020) | *                                 | *                               | *                         | *                                                                            | *                                                               | -                         | *                                                | -                             | 6                    |
| Li (2020)     | *                                 | *                               | -                         | *                                                                            | *                                                               | *                         | *                                                | -                             | 6                    |
| Lung (2009)   | -                                 | -                               | -                         | -                                                                            | *                                                               | *                         | *                                                | *                             | 4                    |
| Zhao (2020)   | *                                 | *                               | -                         | *                                                                            | *                                                               | -                         | *                                                | *                             | 6                    |

### Qualitative Studies

| Author (Year) | JBI Critical Appraisal Checklist for Qualitative Research                           |                                                                                   |                                                                                 |                                                                                        |                                                                              |                                                                           |                                                                                |                                                             |                                                                                                                      |                                                                                                       |                   |
|---------------|-------------------------------------------------------------------------------------|-----------------------------------------------------------------------------------|---------------------------------------------------------------------------------|----------------------------------------------------------------------------------------|------------------------------------------------------------------------------|---------------------------------------------------------------------------|--------------------------------------------------------------------------------|-------------------------------------------------------------|----------------------------------------------------------------------------------------------------------------------|-------------------------------------------------------------------------------------------------------|-------------------|
|               | Is there congruity between stated philosophical perspective & research methodology? | Is there congruity between research methodology & research question / objectives? | Is there congruity between research methodology & methods used to collect data? | Is there congruity between research methodology and representation & analysis of data? | Is there congruity between research methodology & interpretation of results? | Is there a statement locating the researcher culturally or theoretically? | Is the influence of the researcher on the research, and vice-versa, addressed? | Are participants, and their voices, adequately represented? | Is the research ethical according to current criteria? Is there evidence of ethical approval by an appropriate body? | Do the conclusions drawn in the research report flow from the analysis or interpretation of the data? | Overall appraisal |
| Khot (2020)   | Unclear                                                                             | Yes                                                                               | Unclear                                                                         | Unclear                                                                                | Unclear                                                                      | No                                                                        | No                                                                             | Unclear                                                     | No                                                                                                                   | Yes                                                                                                   | Include           |
| Liu (2020)    | Yes                                                                                 | Yes                                                                               | Yes                                                                             | Yes                                                                                    | Yes                                                                          | No                                                                        | No                                                                             | Yes                                                         | Yes                                                                                                                  | Yes                                                                                                   | Include           |
| Rashid (2020) | Yes                                                                                 | Yes                                                                               | Yes                                                                             | Yes                                                                                    | Yes                                                                          | No                                                                        | No                                                                             | Yes                                                         | Yes                                                                                                                  | Yes                                                                                                   | Include           |
| Smith (2017)  | Unclear                                                                             | Yes                                                                               | Yes                                                                             | Yes                                                                                    | Yes                                                                          | No                                                                        | No                                                                             | Yes                                                         | Yes                                                                                                                  | Yes                                                                                                   | Include           |
| Tan (2006)    | Unclear                                                                             | Yes                                                                               | Yes                                                                             | Yes                                                                                    | Yes                                                                          | No                                                                        | No                                                                             | Yes                                                         | No                                                                                                                   | Yes                                                                                                   | Include           |
| Xu (2020)     | Yes                                                                                 | Yes                                                                               | Yes                                                                             | Yes                                                                                    | Yes                                                                          | Yes                                                                       | No                                                                             | No                                                          | Yes                                                                                                                  | Yes                                                                                                   | Include           |

## Pre- and Post-Test Studies

### JBI Critical Appraisal Checklist for Pre-test, Post-test Design

| Author<br>(Year)  | Is it clear in the study what is the 'cause' and what is the 'effect' (i.e. there is no confusion about which variable comes first)? | Were the participants included in any comparisons similar? | Were the participants included in any comparisons receiving similar treatment/care, other than the exposure or intervention of interest? | Was there a control group? | Were there multiple measurements of the outcome both pre- and post-test intervention/exposure? | Was follow up complete and if not, were differences between groups in terms of their follow up adequately described and analyzed? | Were the outcomes of participants included in any comparisons measured in the same way? | Were outcomes measured in a reliable way? | Was appropriate statistical analysis used? | Overall appraisal |
|-------------------|--------------------------------------------------------------------------------------------------------------------------------------|------------------------------------------------------------|------------------------------------------------------------------------------------------------------------------------------------------|----------------------------|------------------------------------------------------------------------------------------------|-----------------------------------------------------------------------------------------------------------------------------------|-----------------------------------------------------------------------------------------|-------------------------------------------|--------------------------------------------|-------------------|
| Liu, Z.<br>(2020) | Yes                                                                                                                                  | Yes                                                        | Yes                                                                                                                                      | No                         | No                                                                                             | Yes                                                                                                                               | Yes                                                                                     | Yes                                       | Yes                                        | Include           |
